# Supplementary material for: Comparative measurement properties of constant work rate cycling and the endurance shuttle walking test in COPD: the TORRACTO® clinical trial
Source: PubMed Central journal article supplement — Ther Adv Respir Dis. 2020 Jun 1;14:1753466620926858. doi: 10.1177/1753466620926858 (PMC7268161; doi:10.1177/1753466620926858), 2020-06-01
Supplement: Reviewer_1_v.1.pdf [file Reviewer_1_v.1.pdf]

Reviewer 1 v.1

Comments to the Author

the analysis done is excellent and purposeful

please try to correlate results of these tests between them at both baseline and 6 weeks in order to better document their concordance
