# Supplementary material for: Comparative measurement properties of constant work rate cycling and the endurance shuttle walking test in COPD: the TORRACTO® clinical trial
Source: PubMed Central journal article supplement — Ther Adv Respir Dis. 2020 Jun 1;14:1753466620926858. doi: 10.1177/1753466620926858 (PMC7268161; doi:10.1177/1753466620926858), 2020-06-01
Supplement: Reviewer_2_v.2.pdf [file Reviewer_2_v.2.pdf]

Reviewer 2 v.2

Comments to the Author

I have no additional comments. All my previous comments have been properly addressed in the revision.
